# Supplementary material for: N7-methylguanosine tRNA modification promotes esophageal squamous cell carcinoma tumorigenesis via the RPTOR/ULK1/autophagy axis
Source: PubMed Central journal article supplement (PMC8933395; doi:10.1038/s41467-022-29125-7), 2022-03-18
Supplement: 41467_2022_29125_MOESM1_ESM.pdf [file 41467_2022_29125_MOESM1_ESM.pdf]

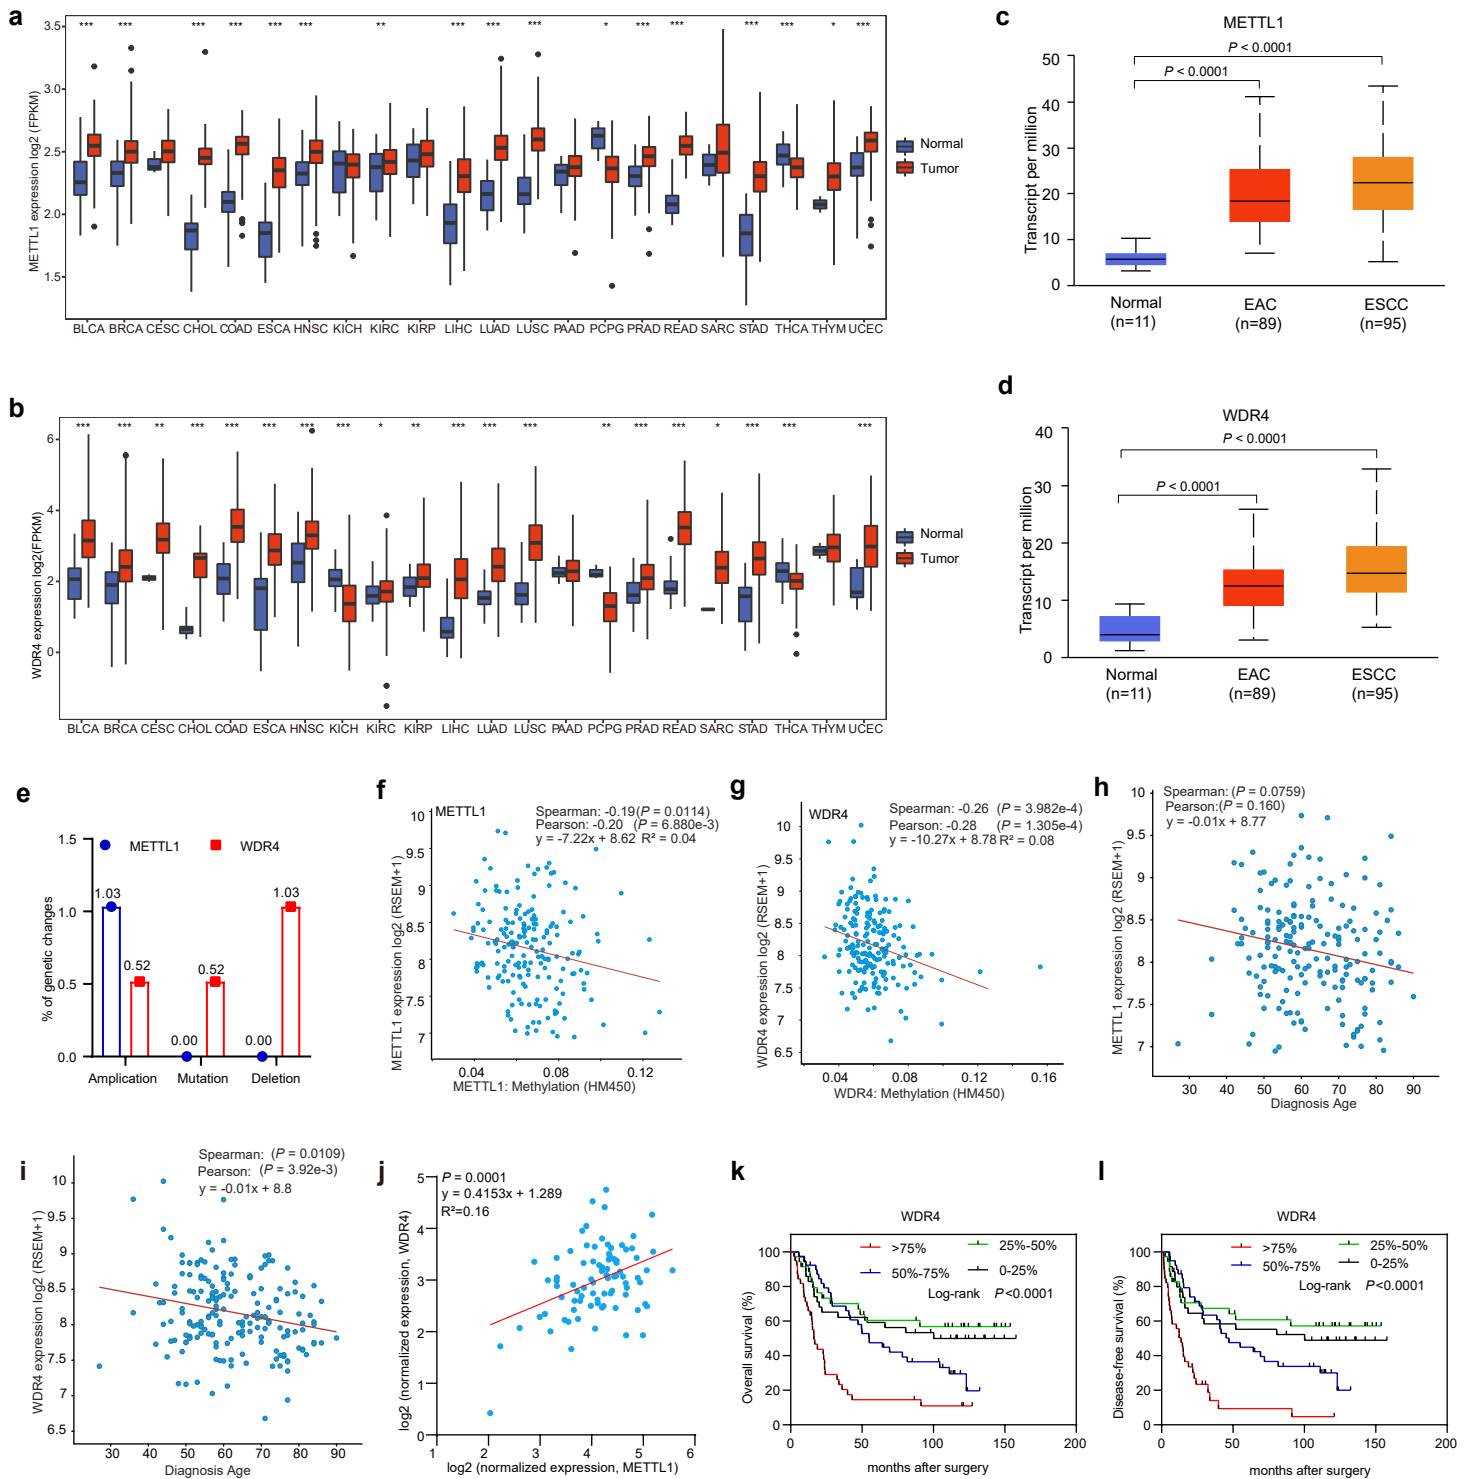

### Supplementary Figure 1 Clinical association of METTL1 and WDR4 in ESCCs.

**a-b**, The relative mRNA levels of METTL1 (**a**) and WDR4 (**b**) in 22 cancer types in TCGA. \* $P < 0.05$ , \*\* $P < 0.01$ , \*\*\* $P < 0.001$ . The exact  $P$  values and sample size for normal and tumor tissues were provided in a source data file. **c-d**, Quantification of METTL1 (**c**) and WDR4 (**d**) expression in normal esophageal tissues and esophageal tumors. **e**, Gene amplification, mutation, and depletion of METTL1 and WDR4 in ESCCs. **f-g**, Correlation between the mRNA expression and DNA methylation of METTL1 (**f**) and WDR4 (**g**) in ESCC. **h-i**, The correlation between patient age and METTL1 (**h**) or WDR4 (**i**) expression level. **j**, Correlation between the expression of METTL1 and WDR4 in ESCCs. **k-l**, Kaplan-Meier analysis of the overall survival (**k**) or disease-free survival (**l**) of ESCC patients based on different H-scores of WDR4. The box plots showing minima, maxima, centre, bounds of box and whiskers and percentile for (**a-d**).  $P$  values were calculated by two-tailed Mann-Whitney U test for (**a-d**), Pearson correlation analysis for (**f-i**) and log-rank test for (**k-l**). The data underlying **a-j** referenced during the study are available in a public repository from the TCGA website (<https://www.cancer.gov/about-nci/organization/ccg/research/structural-genomics/tcga>). The source data of **k** and **l** are protected and are not available due to data privacy laws.

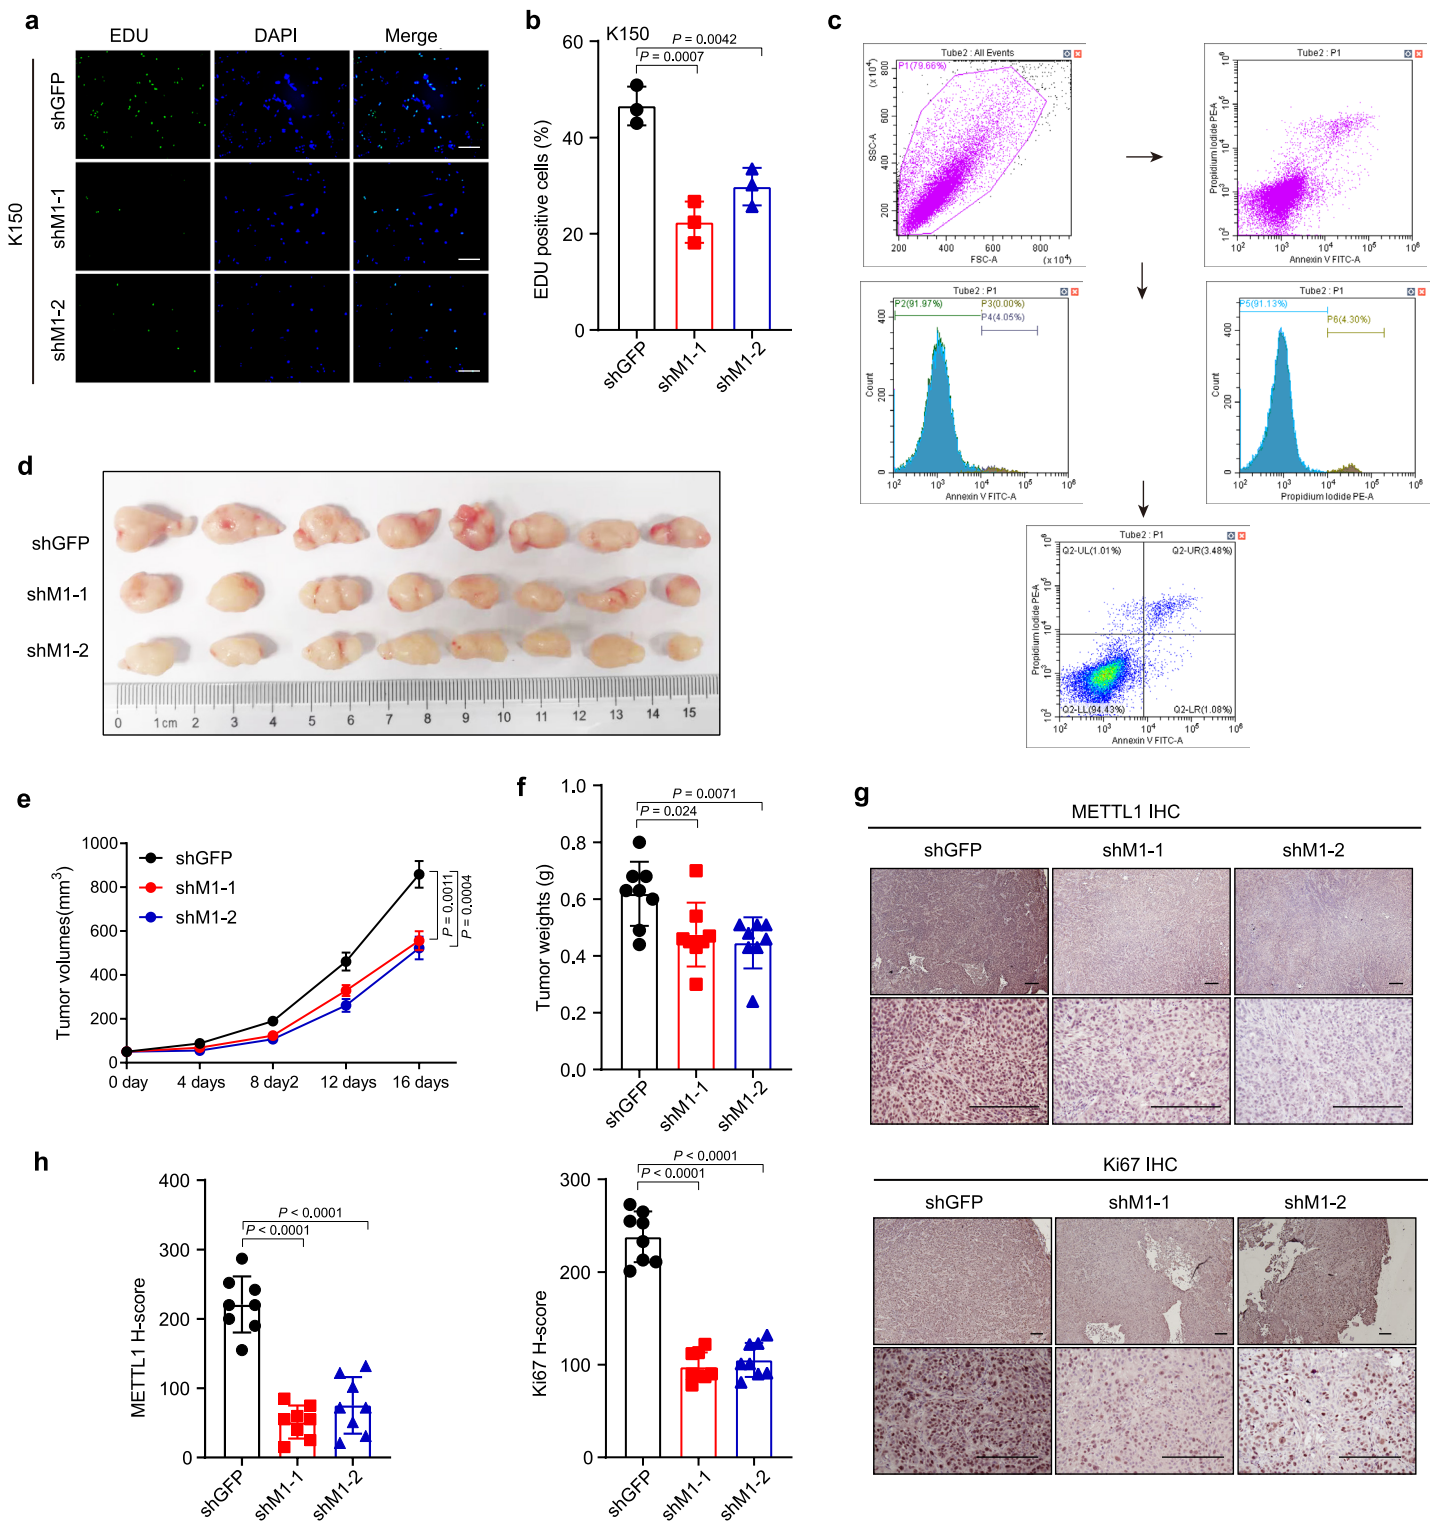

**Supplementary Figure 2 METTL1 knockdown impairs ESCC progression in vitro and in xenograft model.**

**a-b**, Edu assay (**a**) and the quantitative analysis (**b**) of METTL1 knockdown and control K150 ESCC cells. Scale bar, 200  $\mu$ m. **c**, Example of the gating strategy used in the apoptosis assay. **d**, Overview of tumors in xenograft mice model subcutaneously implanted with METTL1 knockdown and control K30 ESCC cells. **e**, Growth curves of tumor volumes in METTL1 knockdown and control K30 ESCC cells. **f**, Tumor weights in METTL1 knockdown and control K30 ESCC cells. **g-h**, Representative images of METTL1 and Ki67 IHC staining (**g**) and the quantitative H-scores (**h**) of tumors obtained from the K150 xenograft model. Scale bar, 200  $\mu$ m. Data represented as mean  $\pm$  SD by one-way ANOVA with Dunnett's multiple comparison test from three independent experiments for (**b**) and eight biological independent samples for (**d-g**). Source data are provided as a Source Data file.



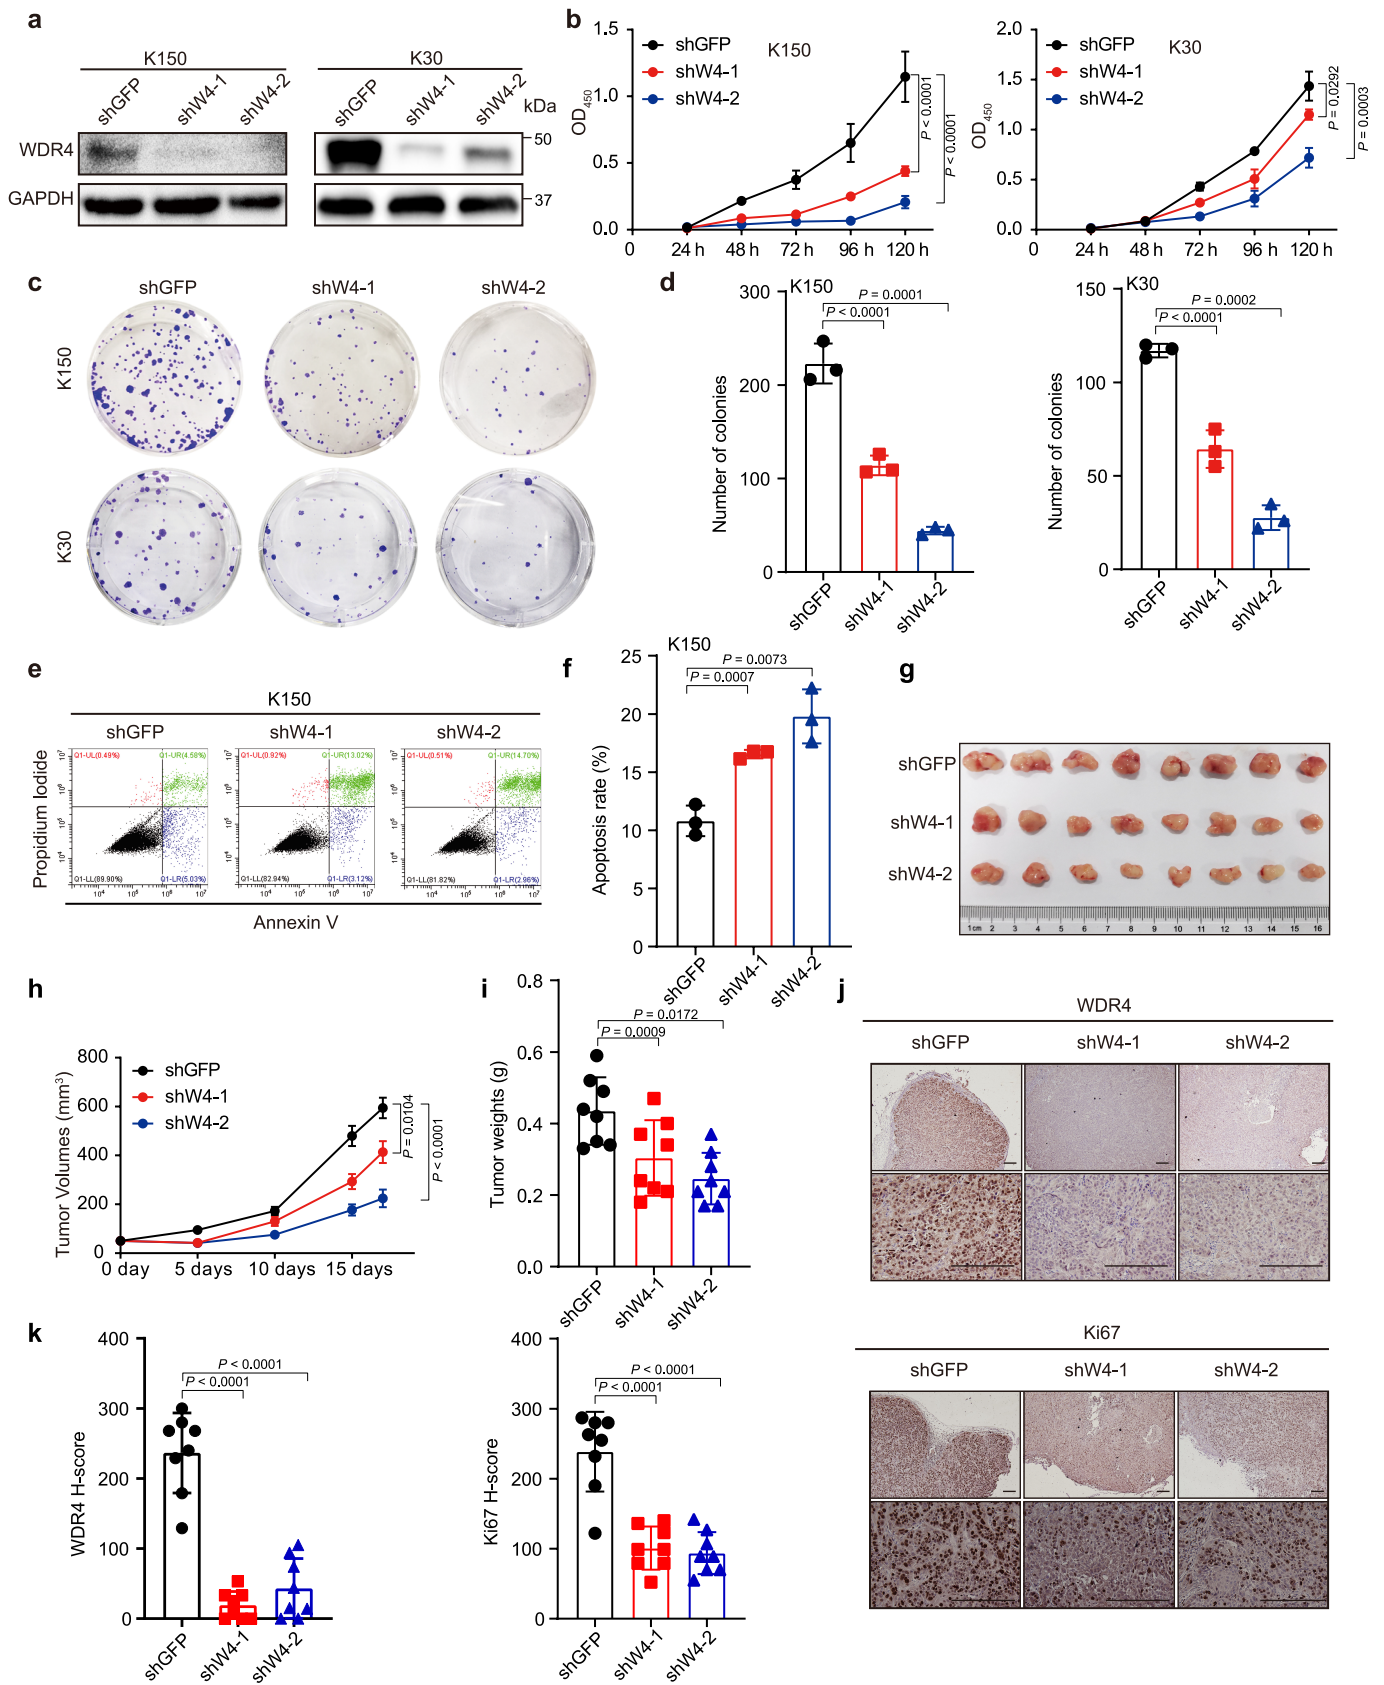

**Supplementary Figure 3 WDR4 knockdown impairs ESCC progression in vitro and in vivo.**

**a**, Western blot with indicated antibodies in WDR4 knockdown and control ESCC cells. **b**, CCK8 analysis of WDR4 knockdown and control ESCC cells. **c-d**, Colony-formation assay (**c**) and the quantification analysis (**d**) of WDR4 knockdown and control ESCC cells. **e-f**, Apoptosis assay (**e**) and the quantification analysis (**f**) of WDR4 knockdown and control ESCC cells. **g**, Overview of tumors in xenograft model subcutaneously implanted with of WDR4 knockdown and control K150 ESCC cells. **h**, Growth curves in xenograft model injected with WDR4 knockdown and control K150 ESCC cells. **i**, Tumor weights in xenograft model injected with WDR4 knockdown and control K150 ESCC cells. **j-k**, Representative images of WDR4 and Ki67 IHC staining (**j**) and the quantitative H-scores (**k**) of tumors obtained from the xenograft mice model. Scale bar, 200  $\mu$ m. Data represented as mean  $\pm$  SD by one-way ANOVA with Dunnett's multiple comparison test from three independent experiments for (**b**, **d**, and **f**) and eight biological samples for (**h-k**). Source data are provided as a Source Data file.

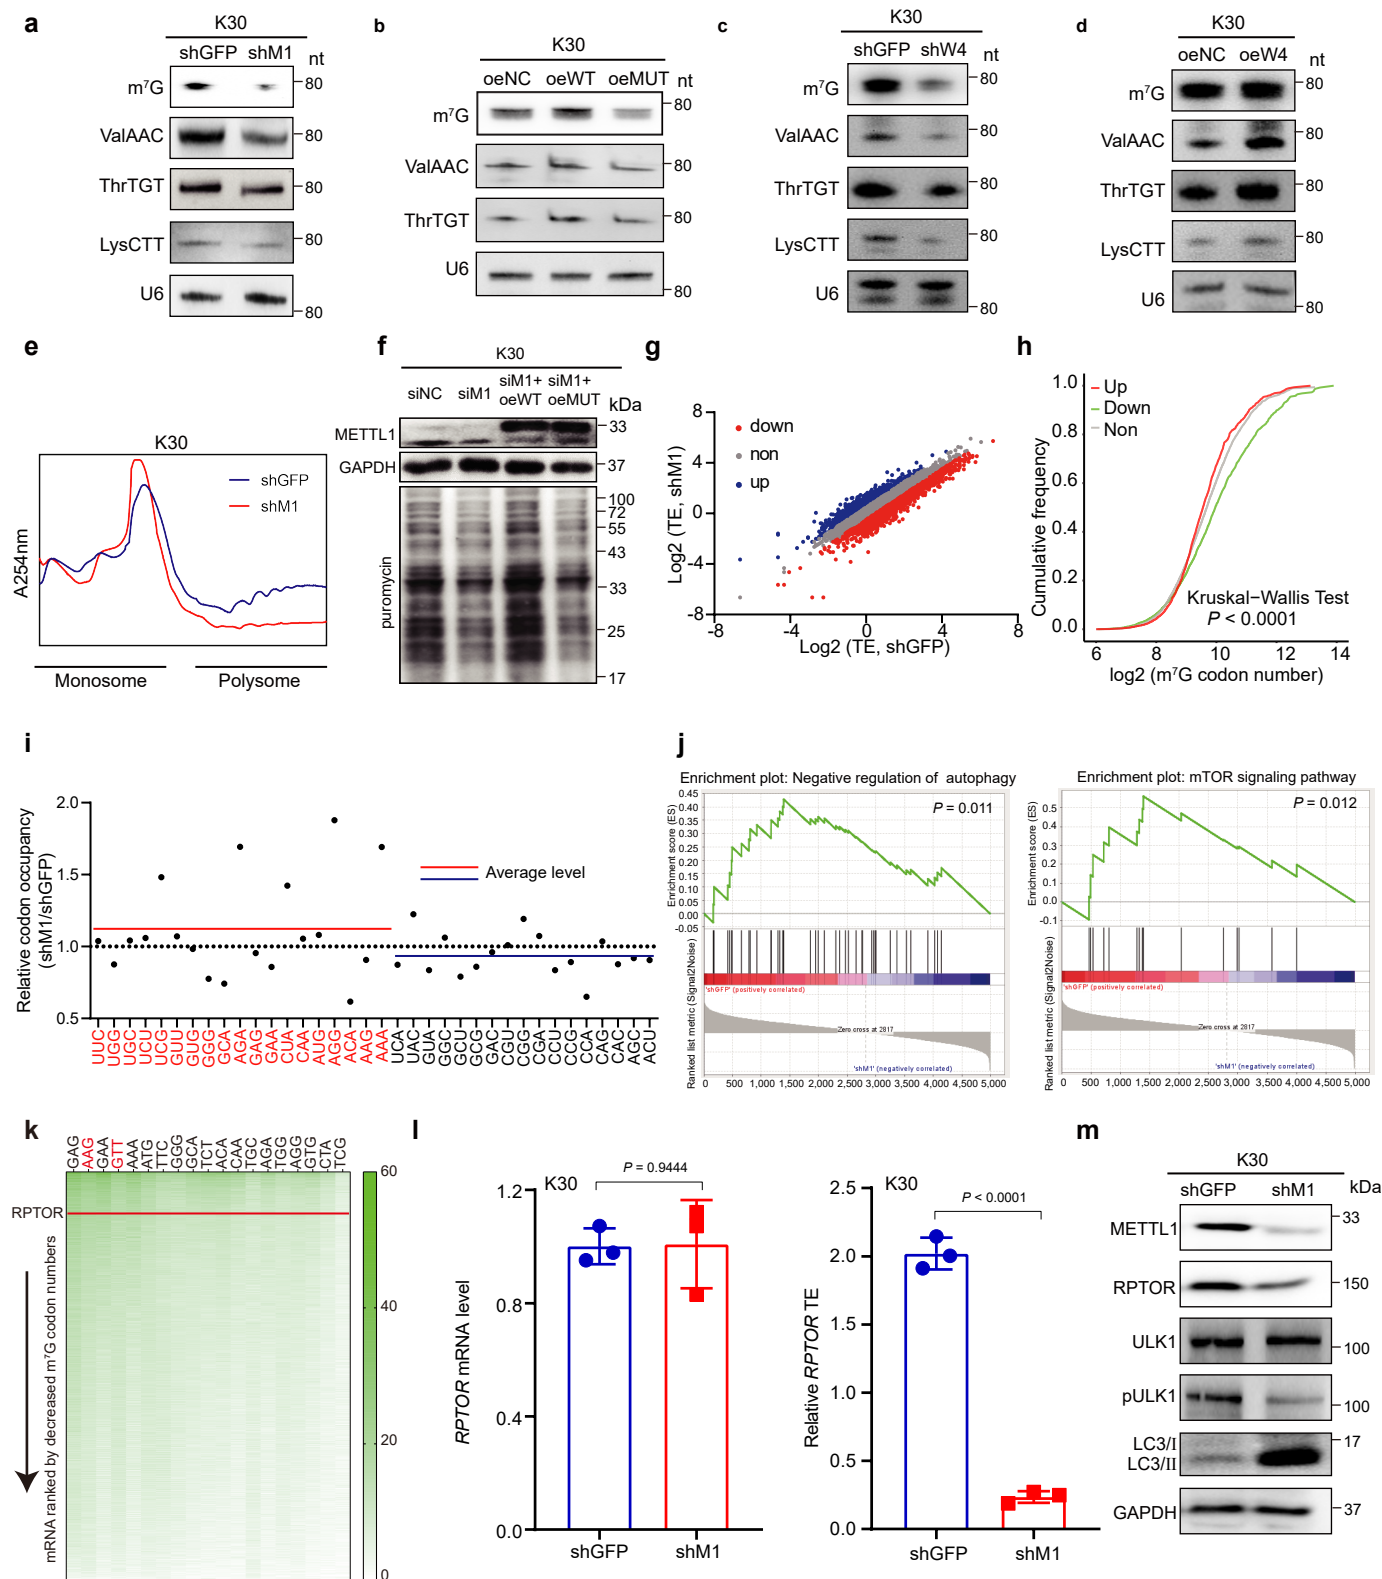

**Supplementary Figure 4 METTL1 regulates m<sup>7</sup>G tRNA modification, tRNA expression and oncogenic mRNA translation.**

**a-d**, Northern blot with indicated tRNA probes in METTL1 depleted K30 cells (**a**), wild type METTL1 or mutant METTL1 overexpressed K30 cells (**b**), WDR4-depleted K30 cells (**c**) and WDR4 overexpressed K30 cells (**d**). U6 snRNA was used as a loading control. **e**, Polysome profiling of METTL1 depleted and control K30 cells. **f**, Puromycin intake assay of METTL1 depleted K30 cells rescued with wild type or catalytic inactive METTL1. **g**, Scatterplot of TEs in the METTL1 knockdown and control cells in the Ribo-seq data. **h**, Codon number in the coding sequence (CDS) region of the genes with increased TEs (up), decreased TEs (down), and other genes (non) in Ribo-seq data in the METTL1 knockdown cells. **i**, Relative ribosome occupancy at individual codons at A sites in METTL1 depleted cells and control cells. Only codons with detectable corresponding tRNA expression were shown. The codons decoded by non-m<sup>7</sup>G tRNAs (black) and codons decoded by m<sup>7</sup>G tRNAs (red) were presented. **j**, GSEA analysis of decreased translated mRNAs in Ribo-seq data. **k**, Heatmap showed the enrichment of m<sup>7</sup>G-related codons in all detected mRNAs. **l**, qRT-PCR analysis of polyribosome-mRNAs and input mRNAs in K30 cells from three independent experiments. **m**, Western blot analysis with indicated antibodies in K30 cells. Data represented as mean  $\pm$  SD.  $P$  values are calculated by permutation test for (**j**) and two-tailed unpaired Student's  $t$  test for (**l**). Source data are provided as a Source Data file.

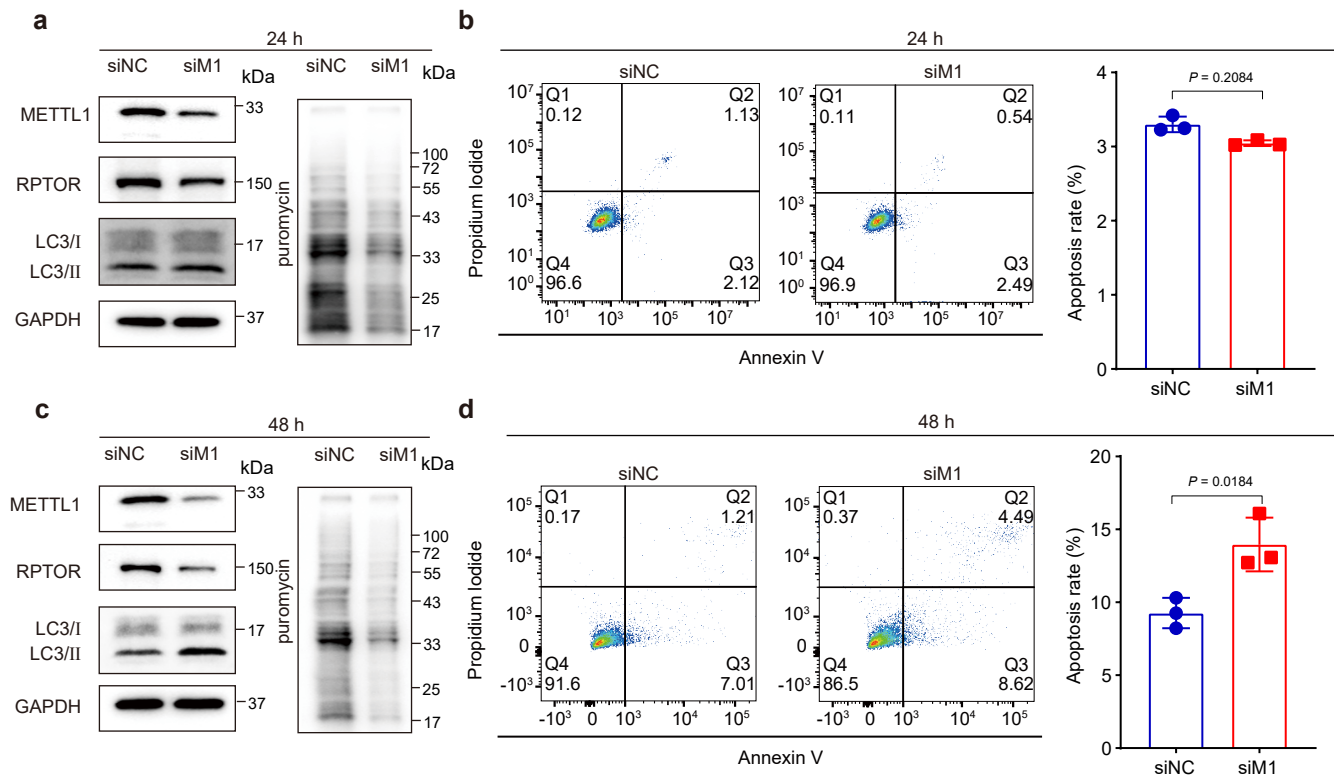

**Supplementary Figure 5 Decreased mRNA translation upon METTL1 knockdown leads to impaired cell survival.**

**a**, The puromycin incorporation and protein levels of RPTOR and LC3 at 24 h after METTL1 knockdown in K150 cells. **b**, The apoptosis rate of K150 ESCC cells at 24 h after METTL1 knockdown. **c**, The puromycin incorporation and protein levels of RPTOR and LC3 at 48 h after METTL1 knockdown in K150 cells. **d**, The apoptosis rate of K150 ESCC cells at 48 h after METTL1 knockdown. Data represented as mean  $\pm$  SD by two-tailed unpaired Student's t test from three independent experiments for (**b** and **d**). Source data are provided as a Source Data file.

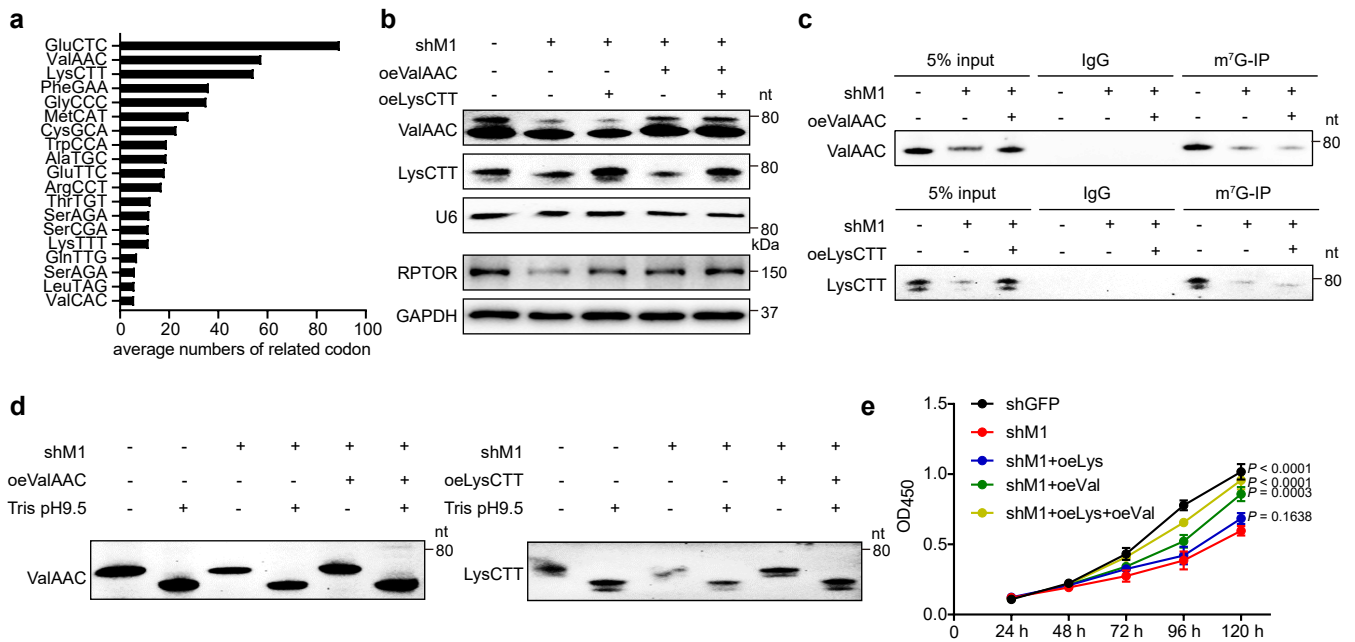

**Supplementary Figure 6 m<sup>7</sup>G-modified tRNAs mediate METTL1's function in ESCC progression.**

**a**, Average number of individual m<sup>7</sup>G-modified tRNA decoded codons in TE-down mRNAs in K150 ESCC cells. **b**, Northern blot and western blot with indicated probes and antibodies in K150 ESCC cells. **c**, m<sup>7</sup>G MeRIP-northern blot with indicated probes. **d**, tRNA charging assay to detect the charging of ectopically overexpressed ValAAC and LysCTT tRNAs. **e**, CCK8 assay of METTL1 knockdown K150 ESCC cells with or without tRNA overexpression. Data represented as mean  $\pm$  SD from three independent experiments for (**e**). Significant difference from shM1 group calculated by one-way ANOVA with Dunnett's multiple comparison test are shown on graphs (**e**). Source data are provided as a Source Data file.



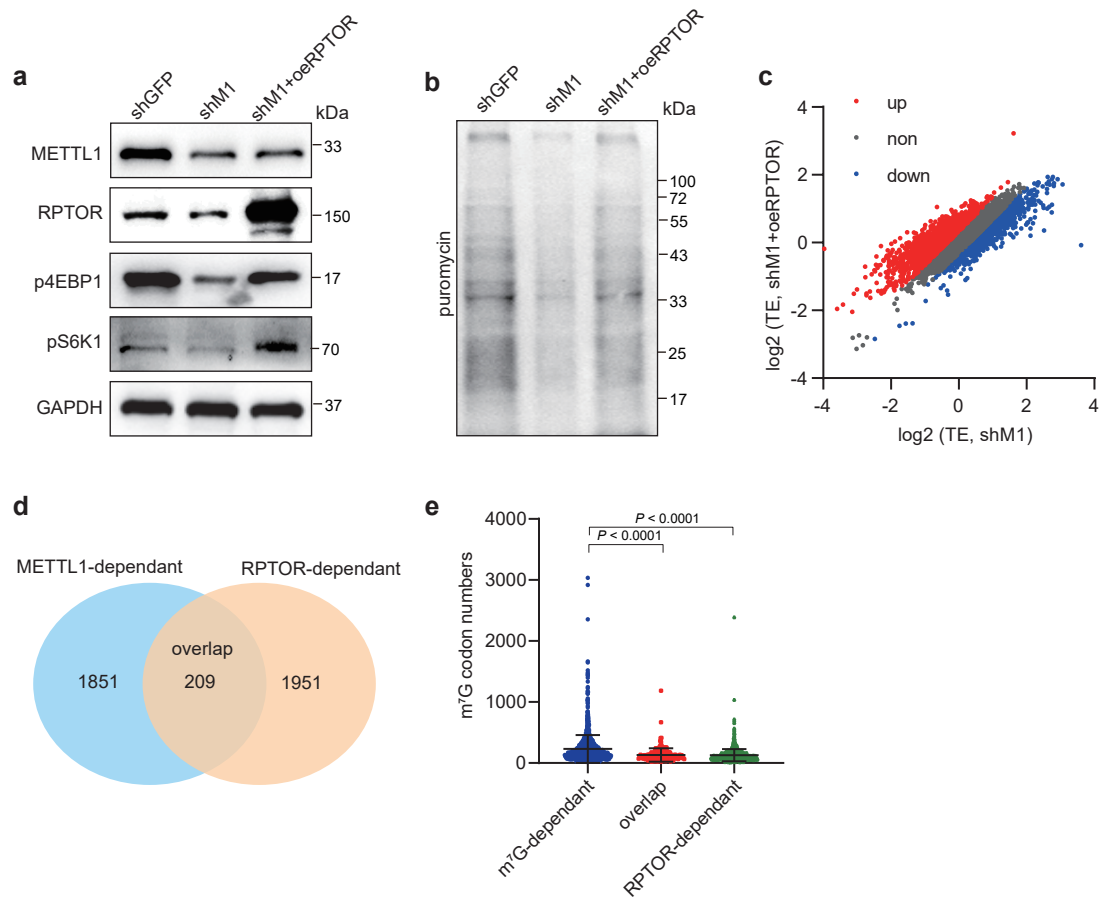

**Supplementary Figure 7 Overexpression of RPTOR restores translation of METTL1 depleted ESCC cells.**

**a**, Western blot with indicated antibodies in METTL1 depleted K150 ESCC cells with or without RPTOR overexpression. **b**, Puromycin incorporation assay in METTL1 depleted K150 ESCC cells with or without RPTOR overexpression. **c**, Scatterplot of TEs in the METTL1 knockdown cells with or without RPTOR overexpression. **d**, Overlap of TE down mRNAs upon METTL1 knockdown and TE up mRNAs upon RPTOR overexpression. **e**, Comparison of m<sup>7</sup>G related codon numbers in METTL1-dependent, RPTOR-dependent and the overlap group. Data represented as mean ± SD by two-tailed Mann-Whitney U test from three biological independent samples. Source data are provided as a Source Data file.

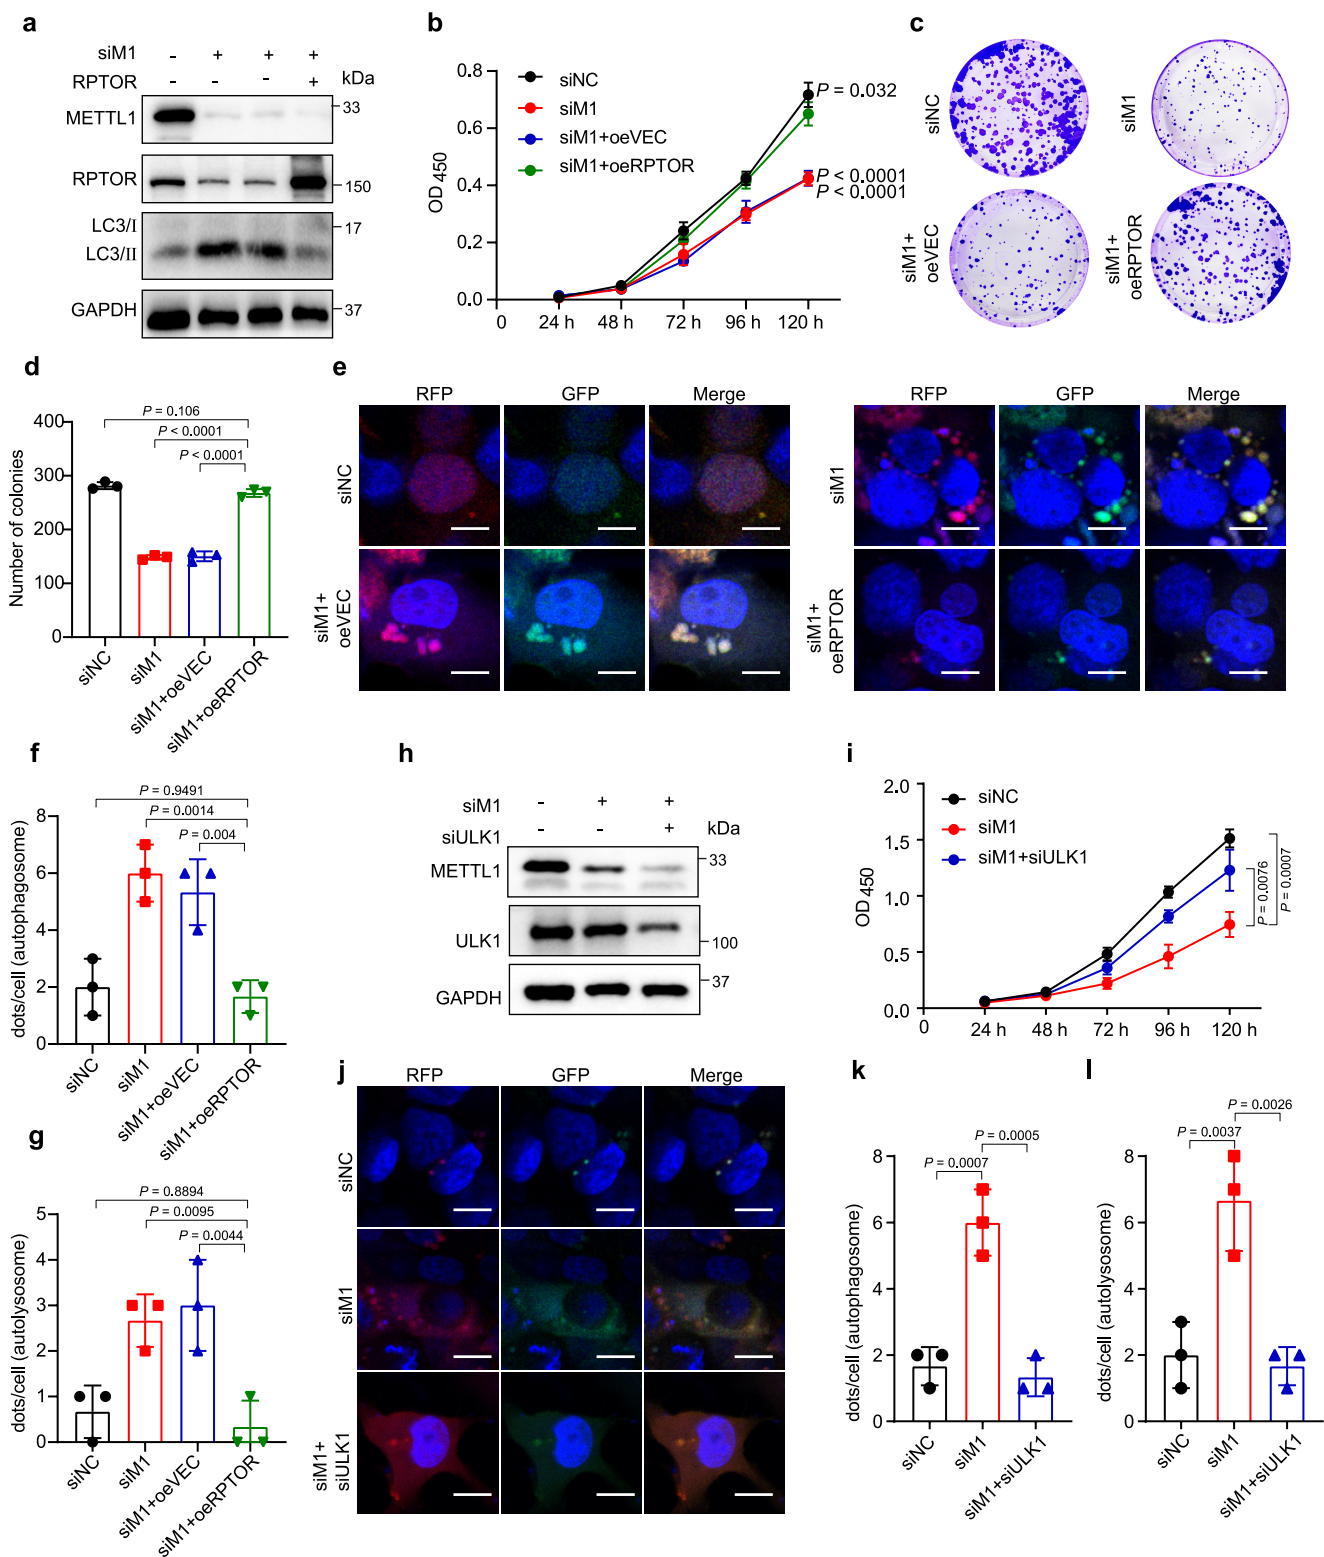

### Supplementary Figure 8 RPTOR and ULK1-mediated autophagy play essential roles in ESCC progression in K30 cells.

**a**, Western blot analysis with indicated antibodies in METTL1 knockdown K30 cells with or without RPTOR overexpression. **b**, CCK8 assay of METTL1 knockdown K30 cells with or without RPTOR overexpression. **c-d**, Colony-formation assay (**c**) and the quantification analysis (**d**) of METTL1 knockdown K30 cells with or without RPTOR overexpression. **e-g**, The autophagic fluxes (**e**) and the quantification analysis (**f, g**) of K30 cells stably expressed mRFP-EGFP-LC3 fusion protein. Scale bar, 10  $\mu$ m. **h**, Western blot analysis with indicated antibodies in K30 cells. **i**, CCK8 assay of METTL1 knockdown K30 cells with or without ULK1 knockdown. **j-l**, The autophagic fluxes (**j**) and the quantification analysis (**k, l**) of K30 cells stably expressed mRFP-EGFP-LC3 fusion protein. Scale bar, 10  $\mu$ m. Data represented as mean  $\pm$  SD from three independent experiments. Significant difference from siM1+oeRPTOR group calculated by one-way ANOVA with Dunnett's multiple comparison test are shown on graphs (**b, d, f, and g**), and significant difference from siM1+siULK1 group calculated by one-way ANOVA with Dunnett's multiple comparison test are shown on graphs (**i, k, and l**). Source data are provided as a Source Data file.

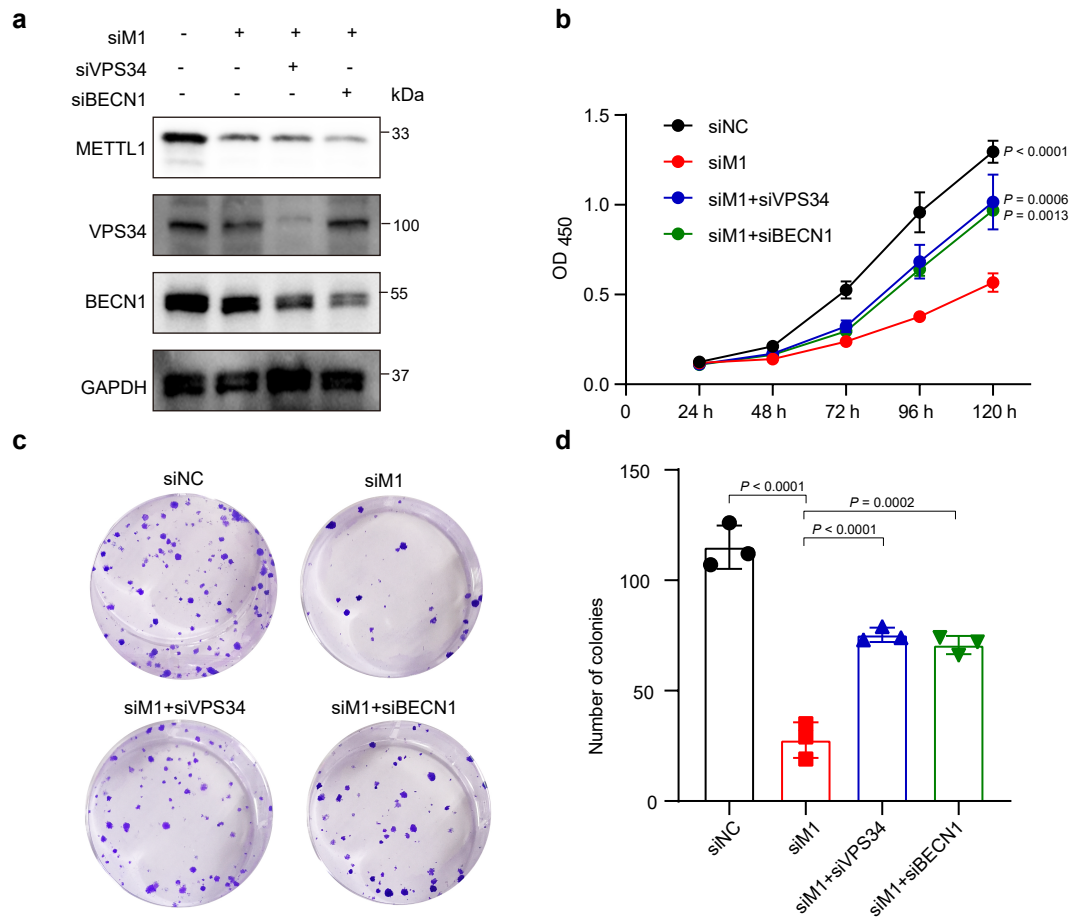

**Supplementary Figure 9 VPS34 and BECN1 mediate METTL1's function in ESCC.**

**a**, Western blot analysis with indicated antibodies. **b**, CCK8 assay of METTL1 knockdown K150 cells with VPS34 or BECN1 knockdown. **c-d**, Colony-formation assay (**c**) and the quantitative analysis (**d**) of METTL1 knockdown K150 cells with VPS34 or BECN1 knockdown. Data represented as mean  $\pm$  SD from three independent experiments. Significant difference from siM1 group calculated by one-way ANOVA with Dunnett's multiple comparison test are shown on graphs. Source data are provided as a Source Data file.

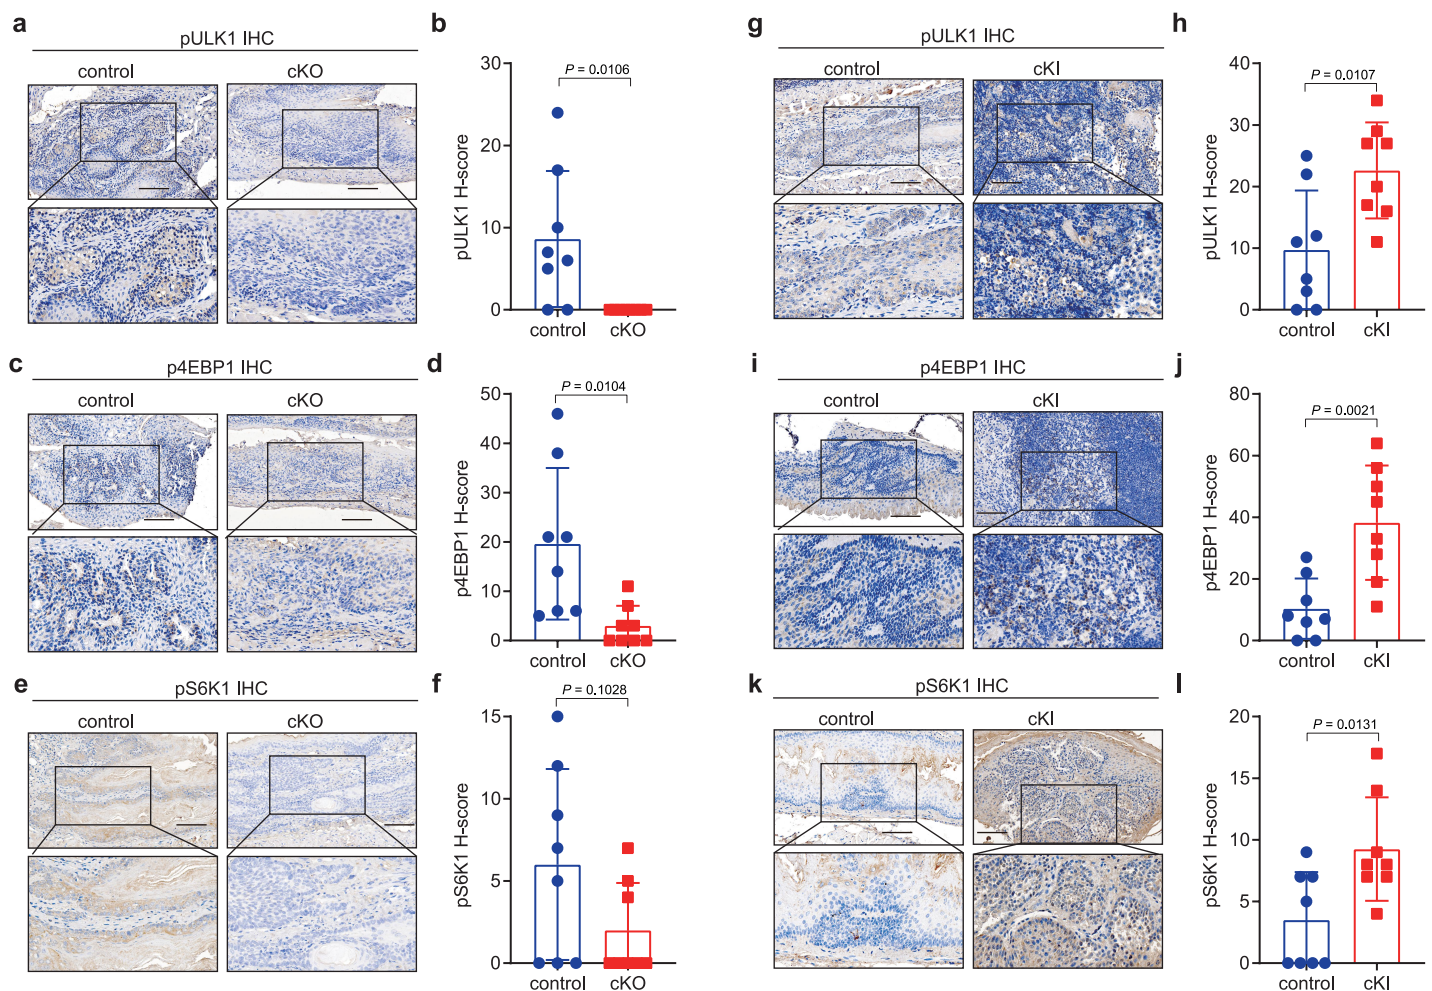

**Supplementary Figure 10 The downstream targets of RPTOR were regulated by METTL1 in vivo.**

**a-b**, Representative images (**a**) and the quantification (**b**) of pULK1 IHC staining in *Mettl1* cKO and control mice. Scale bar, 100  $\mu$ m. **c-d**, Representative images (**c**) and the quantification (**d**) of p4EBP1 IHC staining in *Mettl1* cKO and control mice. Scale bar, 100  $\mu$ m. **e-f**, Representative images (**e**) and the quantification (**f**) of pS6K1 IHC staining in *Mettl1* cKO and control mice. Scale bar, 100  $\mu$ m. **g-h**, Representative images (**g**) and the quantification (**h**) of pULK1 IHC staining in *Mettl1* cKI and control mice. Scale bar, 100  $\mu$ m. **i-j**, Representative images (**i**) and the quantification (**j**) of p4EBP1 IHC staining in *Mettl1* cKI and control mice. Scale bar, 100  $\mu$ m. **k-l**, Representative images (**k**) and the quantification (**l**) of pS6K1 IHC staining in *Mettl1* cKI and control mice. Scale bar, 100  $\mu$ m. Data represented as mean  $\pm$  SD by two-tailed unpaired Student's t test, from eight biological independent samples for each group. Source data are provided as a Source Data file.



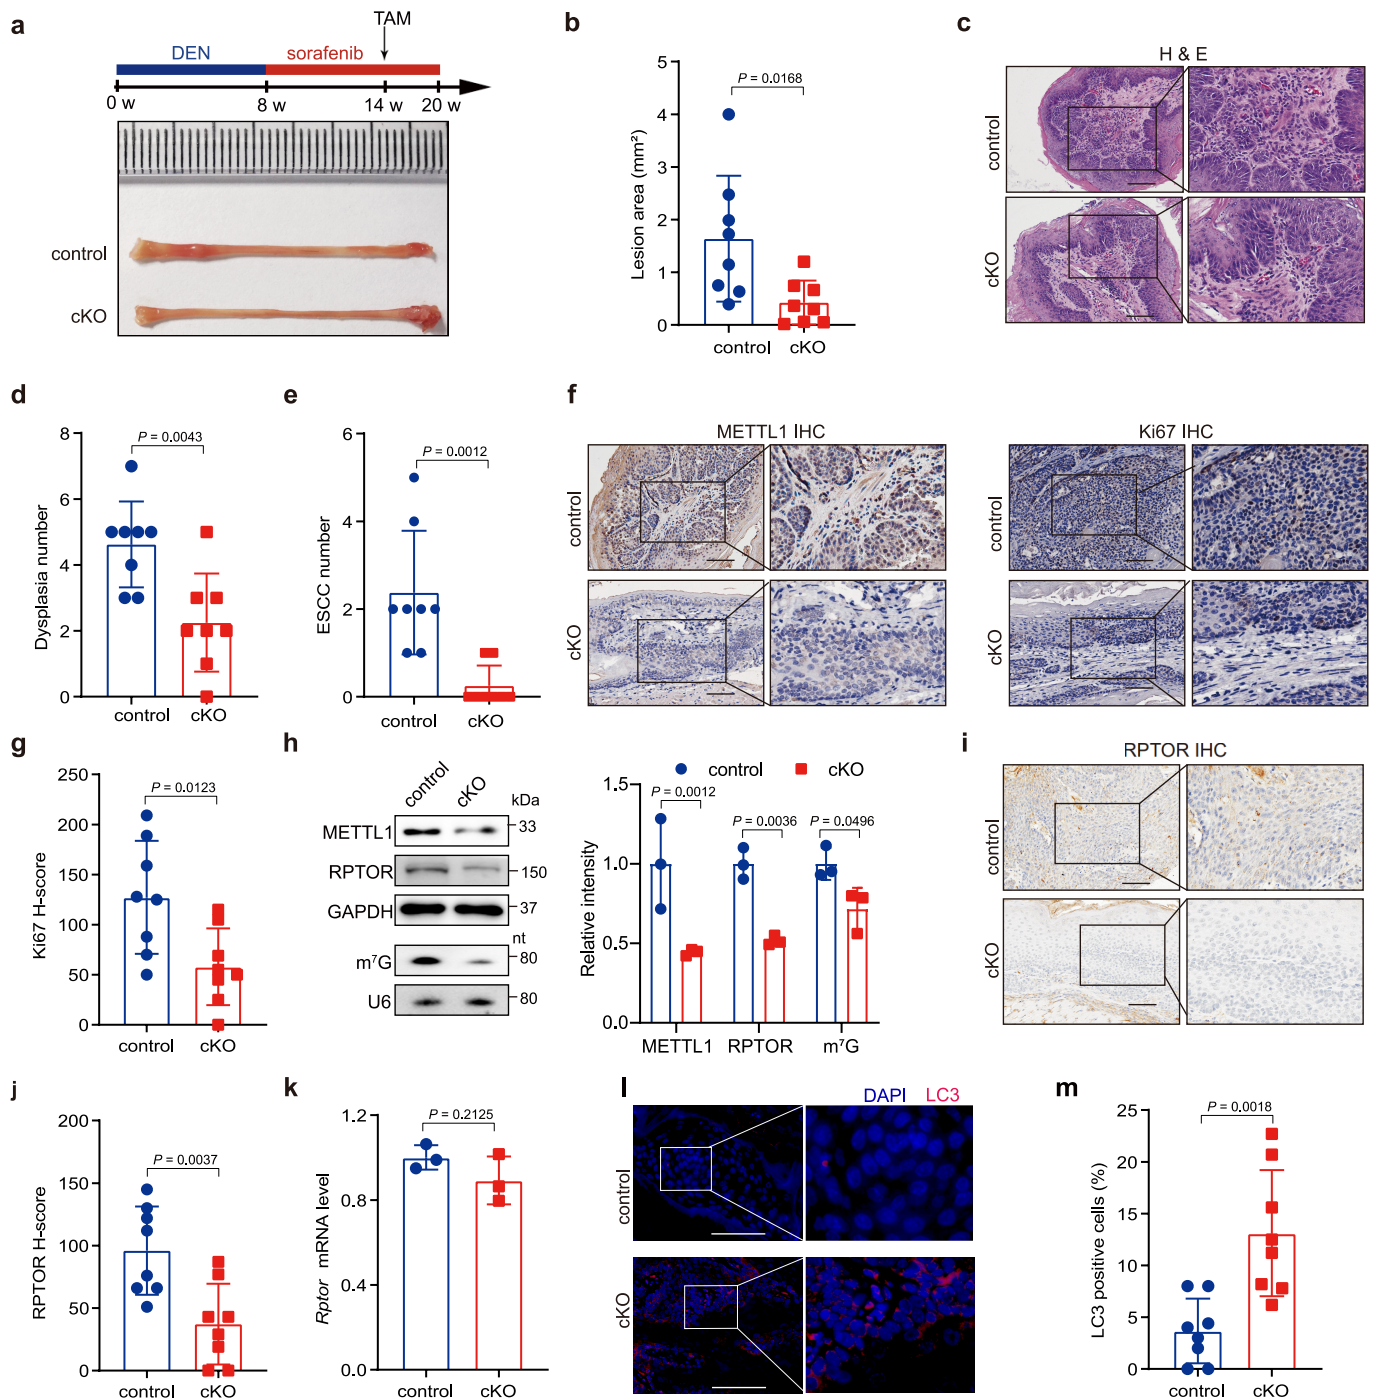

**Supplementary Figure 11 Knockout of *Mettl1* inhibits in vivo ESCC progression.**

**a**, Experimental design for ESCC progression model and the representative images of esophageal lesions in *Mettl1* cKO and control mice. **b**, Quantification of lesion areas. **c**, Representative H&E staining of esophagus. Scale bar, 100  $\mu$ m. **d**, Quantification of dysplasia numbers. **e**, Quantification of ESCC numbers. **f-g**, Representative images of METTL1 and Ki67 IHC staining (**f**) and the quantification Ki67 H-scores (**g**) in *Mettl1* cKO and control mice. Scale bar, 100  $\mu$ m. **h**, western blot analysis and northwestern blot analysis showed the m<sup>7</sup>G modification level and indicated protein levels, right panel: quantification of the blot signals. **i-j**, Representative images (**i**) and the quantification (**j**) of RPTOR IHC staining. Scale bar, 100  $\mu$ m. **k**, qRT-PCR analysis of *Rptor* mRNA level in the cKO and control mice. **l-m**, IF assay (**l**) and the quantification (**m**) of LC3 level. Scale bar, 100  $\mu$ m. Data represented as mean  $\pm$  SD by two-tailed unpaired Student's t test from eight biological independent samples for each group for (**a-g**, **i**, **j**, **l**, and **m**) and three biological independent samples for (**h** and **k**). Source data are provided as a Source Data file.

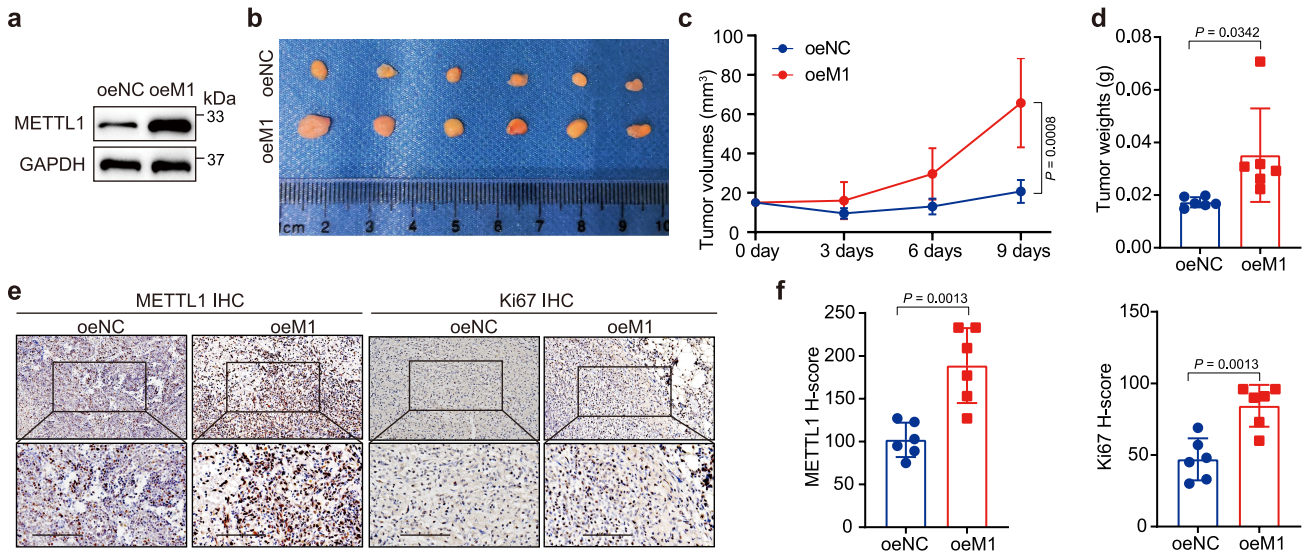

**Supplementary Figure 12 METTL1 overexpression promotes ESCC tumorigenesis in xenograft mouse model.**

**a**, Western blot assay showed the indicated protein levels in K150 ESCC cells. **b**, Overview of tumors in xenograft mice model subcutaneously implanted with METTL1 overexpression and control ESCC cells. **c**, Growth curves of tumor volumes in METTL1 overexpression and control group. **d**, Tumor weights in METTL1 overexpression and control group. **e-f**, Representative images of METTL1 and Ki67 IHC staining (**e**) and the quantitative H-scores (**f**) of tumors obtained from the xenograft model. Scale bar, 200  $\mu$ m. Data represented as mean  $\pm$  SD by two-tailed unpaired Student's t test from six biological independent samples for each group. Source data are provided as a Source Data file.

**Supplementary Table 1. Genes enriched in autophagy and mTOR signaling pathway**

| <b>Genes enriched in autophagy pathway</b>      |
|-------------------------------------------------|
| <i>SRC</i>                                      |
| <i>SREBF1</i>                                   |
| <i>WDR81</i>                                    |
| <i>DAPK3</i>                                    |
| <i>ATG2A</i>                                    |
| <i>ITGB4</i>                                    |
| <i>QSOX1</i>                                    |
| <i>BOK</i>                                      |
| <i>RPTOR</i>                                    |
| <i>WDR24</i>                                    |
| <i>TMEM150A</i>                                 |
| <i>CHMP6</i>                                    |
| <i>KAT5</i>                                     |
| <i>CAPN1</i>                                    |
| <i>UBXN6</i>                                    |
| <i>KLHL22</i>                                   |
| <i>EEF1A2</i>                                   |
| <i>ULK3</i>                                     |
| <i>ATP6V0D1</i>                                 |
| <i>MAP1S</i>                                    |
| <i>CTSD</i>                                     |
| <i>GPSM1</i>                                    |
| <b>Genes enriched in mTOR signaling pathway</b> |
| <i>SREBF1</i>                                   |
| <i>RPTOR</i>                                    |
| <i>SFN</i>                                      |
| <i>PML</i>                                      |
| <i>POLDIP3</i>                                  |
| <i>PRR5</i>                                     |
| <i>EEF2</i>                                     |

**Supplementary Table 2. Baseline information of 120 patients with esophageal cancer.**

| <b>Characteristic</b> | <b>Number</b> |
|-----------------------|---------------|
| <b>Gender</b>         |               |
| Female                | 33 (27.5%)    |
| Male                  | 87 (72.5%)    |
| <b>Age</b>            |               |
| Median (range)        | 58 (38-80)    |
| <b>T category</b>     |               |
| T1                    | 2 (1.7%)      |
| T2                    | 30 (25%)      |
| T3                    | 88 (73.3%)    |
| T4                    | 0 (0%)        |
| <b>N category</b>     |               |
| N0                    | 67 (55.8%)    |
| N1                    | 51 (42.5%)    |
| N2                    | 2 (1.7%)      |
| <b>Overall stage</b>  |               |
| I                     | 3 (2.5%)      |
| II                    | 73 (60.8%)    |
| III                   | 44 (36.7%)    |
| IV                    | 0 (0%)        |



**Supplementary Table 3. Antibodies used in this study.**

| <b>Antibodies</b>                                              | <b>source</b>             | <b>identifier</b> |
|----------------------------------------------------------------|---------------------------|-------------------|
| Rabbit monoclonal anti-WDR4                                    | Abcam                     | Cat# ab169526     |
| Rabbit polyclonal anti-Ki67                                    | Abcam                     | Cat# ab15580      |
| Rabbit polyclonal anti-Phospho-ULK1 (ser758)                   | Affinity                  | Cat# AF4387       |
| Rabbit polyclonal anti-ULK1                                    | Beyotime                  | Cat# AF8307       |
| Phospho-4E-BP1 (Thr37/46) (236B4) Rabbit mAb                   | Cell signaling technology | Cat# 2855         |
| Phospho-p70 S6 Kinase (Thr421/Ser424) Antibody                 | Cell signaling technology | Cat# 9204         |
| Anti-rabbit IgG HRP-linked Antibody                            | Cell signaling technology | Cat# 7074S        |
| Anti-mouse IgG HRP-linked Antibody                             | Cell signaling technology | Cat# 7076S        |
| Rabbit polyclonal anti-LC3                                     | Cell signaling technology | Cat# 2775S        |
| Mouse monoclonal 7-methylguanosine (m <sup>7</sup> G) antibody | MBL International         | Cat# RN017M       |
| Mouse monoclonal anti-puromycin                                | Millipore                 | Cat# MABE343      |
| PI3 Kinase p110 Alpha Monoclonal antibody                      | Proteintech               | Cat# 67071-1-Ig   |
| Rabbit polyclonal anti-METTL1                                  | Proteintech               | Cat# 14994-1-AP   |
| Mouse monoclonal anti-RPTOR                                    | Proteintech               | Cat# 20984-1-AP   |
| Rabbit polyclonal anti-GAPDH                                   | Proteintech               | Cat# 10494-1-AP   |
| Rabbit polyclonal anti-VPS34                                   | Proteintech               | Cat# 12452-1-AP   |
| Rabbit polyclonal anti-BECN1                                   | Proteintech               | Cat# 11306-1-AP   |
| Goat anti-rabbit IgG H&L DyLight® 594                          | Abcam                     | Cat# ab96885      |
| Rabbit monoclonal anti-AKT                                     | Proteintech               | Cat#60203-2-Ig    |
| Rabbit monoclonal anti-mTOR                                    | Proteintech               | Cat#66888-1-Ig    |

**Supplementary Table 4. Oligonucleotides sequences in this study.**

| <b>The sequences of METTL1 shRNA</b>         |                           |
|----------------------------------------------|---------------------------|
| <b>No.</b>                                   | <b>sequence (5' - 3')</b> |
| shMETTL1-1                                   | AAATGAGTGCACATCCAGTCG     |
| shMETTL1-2                                   | TTTCTTATCCTTTGGGTCATC     |
| shWDR4-1                                     | AAGAGGCTGTCATCATCACTG     |
| ShWDR4-2                                     | TCTAACAGCATAGACAGGTGC     |
| <b>The sequences of siRNA</b>                |                           |
| <b>No.</b>                                   | <b>sequence (5' - 3')</b> |
| METTL1-1                                     | GATGACCCAAAGGATAAGAAA     |
| METTL1-2                                     | GGATGTGCACTCATTTCGA       |
| ULK1-1                                       | CCTTCGCGGTGGTCTTCAAdTdT   |
| ULK1-2                                       | CGCGGTACCTCCAGAGCAAdTdT   |
| <b>Probe sequences of tRNAs and U6 snRNA</b> |                           |
| <b>No.</b>                                   | <b>sequence (5' - 3')</b> |
| tRNA-Lys-CTT                                 | AACGTGGGGCTCGAACCCAC      |
| tRNA-Val-AAC                                 | TGTTTCCGCCCGTTTCGAA       |
| tRNA-Thr-TGT                                 | CTAACCCCTGAGCTATGGAG      |
| U6 snRNA                                     | TGGAACGCTTCACGAATTTG      |
| <b>Primers used for the qRT-PCR assay</b>    |                           |
| <b>No.</b>                                   | <b>sequence (5' - 3')</b> |
| hGAPDH-F                                     | GTCTCCTCTGACTTCAACAGCG    |
| hGAPDH-R                                     | ACCACCCTGTTGCTGTAGCCAA    |
| h $\beta$ -ACTIN-F                           | CACCATTGGCAATGAGCGGTTTC   |
| h $\beta$ -ACTIN-R                           | AGGTCTTTGCGGATGTCCACGT    |
| hmTOR-F                                      | AGCATCGGATGCTTAGGAGTGG    |
| hmTOR-R                                      | CAGCCAGTCATCTTTGGAGACC    |
| hRPTOR-F                                     | GATCGTCAACAGCTATCACACGG   |
| hRPTOR-R                                     | CGAGTCGAAGTTCTGCCAGATC    |
| hMETTL1-F                                    | GGCTTCCAGAACATCGCCTGT     |
| hMETTL1-R                                    | TGTCCGCTTGAAATGTGGGTCG    |
| hWDR4-F                                      | CGTCTACTCCTTTTCGGTGCTG    |
| hWDR4-R                                      | GCAGTGAGGATGAAGCGGTCAT    |
| hAKT1-F                                      | TGGACTACCTGCACTCGGAGAA    |
| hAKT1-R                                      | GTGCCGCAAAGGTCTTCATGG     |
| hPIK3C2A-F                                   | CTTACTCATTGCTTCACCAGTGG   |
| hPIK3C2A-R                                   | GCCTCAATCCAGGTCACAGCTA    |
| hPIK3CA-F                                    | GAAGCACCTGAATAGGCAAGTCG   |
| hPIK3CA-R                                    | GAGCATCCATGAAATCTGGTCCG   |

|                                                                      |                              |
|----------------------------------------------------------------------|------------------------------|
| hPIK3CB-F                                                            | GGTAATCGGAGGATAGGGCAGT       |
| hPIK3CB-R                                                            | CGGCAGTATGCTTCAAGGATGAC      |
| mGapdh-F                                                             | CATCACTGCCACCCAGAAGACTG      |
| mGapdh-R                                                             | ATGCCAGTGAGCTTCCCGTTCAG      |
| mRaptor-F                                                            | CTTCCTATCCGTCTTGGCAGAC       |
| mRaptor-R                                                            | CTCCAGACAGATGGCAATCAGG       |
| mMettl1-F                                                            | GTGGAGTTTGCAGACATAGGCTG      |
| mMettl1-R                                                            | GCACATAGTCCGACACCTTCAC       |
| Firefy-Luc-F                                                         | GGTACTGTTGGTAAAGCCAC         |
| Firefy-Luc-R                                                         | CTCTTCATAGCCTTATGCAG         |
| Renilla-Luc-F                                                        | CAATGGGCAGGTGTCCACTC         |
| Renilla-Luc-R                                                        | GTTCTGGATCATAAACTTTC         |
| <b>Primers for floxed Mettl1 knockdown/knockin allele genotyping</b> |                              |
| <b>No.</b>                                                           | <b>Sequence (5' - 3')</b>    |
| Keratin14-CreER-1                                                    | ACTGGGATCTTCGAACTCTTTGGA C   |
| Keratin14-CreER-2                                                    | GATGTTGGG GCACTGCTCATTCACC   |
| Keratin14-CreER-3                                                    | CCATCTGCCACCAGCCAG           |
| Keratin14-CreER-4                                                    | TCGCCATCTCCAGCAGG            |
| METTL1-cKO-F                                                         | ATACACACTCCT GGCCACTCC TTGT  |
| METTL1-cKO-R                                                         | CCCTGGCTT CTA GGGTGTGAA TCAG |
| METTL1-cKI-WT-F                                                      | AGTCGCTCTGAGTTGTTATCAG       |
| METTL1-cKI-WT-R                                                      | TGA GCATGTCTTAATCTACCTCGATG  |
| METTL1-cKI-MUT-F                                                     | AGTCGCTCTGAGTTGTTATCAG       |
| METTL1-cKI-MUT-R                                                     | GTCAATGGAAAGTCCCTATTGGCGT    |
